# Supplementary material for: Insights into Human Astrocyte Response to H5N1 Infection by Microarray Analysis
Source: PubMed Central journal article supplement (PMC4452922; doi:10.3390/v7052618), 2015-05-22
Supplement: viruses-07-02618-s001.pdf [file viruses-07-02618-s001.pdf]

# Supplementary Materials

**Table S1.** Primers used in this study.

| <b>Genes</b>  | <b>Forward Sequences</b> | <b>Reverse Sequences</b> |
|---------------|--------------------------|--------------------------|
| RIG-I         | GTGCAAAGCCTTGGCATGT      | TGGCTTGGGATGTGGTCTACTC   |
| MDA5          | GTTGAAAAGGCTGGCTGAAAAC   | TCGATAACTCCTGAACCACTG    |
| TLR3          | CTCAGAAGATTACCAGCCGCC    | CCATTATGAGACAGATCTAATG   |
| TLR7          | CACATACCAGACATCTCCCA     | CCCAGTGAATAGGTACACAGTT   |
| CXCL9         | CCAGTAGTGAGAAAGGGTTCG    | AGGGCTTGGGGCAAATTGTT     |
| CXCL10        | TGGCATTCAAGGAGTACCTCTC   | CTTGATGGCCTTCGATTCTG     |
| CXCL11        | GACGCTGTCTTTGCATAGGC     | GGATTTAGGCATCGTTGTCCTTT  |
| IFIT2         | GACACGGTTAAAGTGTGGAGG    | TCCAGACGGTAGCTTGCTATT    |
| IFIT3         | AGAAAAGGTGACCTAGACAAAGC  | CCTTGTAGCAGCACCCAATCT    |
| MX1           | GGTGGTCCCCAGTAATGTGG     | CGTCAAGATTCCGATGGTCCT    |
| ISG15         | CGGGAACAAGTCCACGAA       | CAACACTGGCTCTGGATGG      |
| MX2           | CAGAGGCAGCGGAATCGTAA     | TGAAGCTCTAGCTCGGTGTTC    |
| RSAD2         | TTGGACATTCTCGCTATCTCCT   | AGTGCTTTGATCTGTTCCGTC    |
| IL-6          | AGGAGACTTGCCTGGTGA       | CAGGGGTGGTTATTGCATCT     |
| IL-8          | TTGGCAGCCTTCCTGATTTT     | TCTTTAGCACTCCTTGGCAAAC   |
| CCL5          | CCTCATTGCTACTGCCCTCT     | GGTGTGGTGTCCGAGGAATA     |
| GAPDH         | GCAAAGGCTGTGGGCAAGG      | GGAGGAGTGGGTGTCGCTG      |
| TNF- $\alpha$ | ACGGCATGGATCTCAAAGACAACC | TGAGATAGCAAATCGGCTGACGGT |
| IFN- $\beta$  | GCTTGGATTCTACAAAGAAGCA   | ATAGATGGTCAATGCGGCGTC    |
| GABRA1        | AGCCGTCATTACAAGATGAACTT  | TGGTCTCAGGCGATTGTCATAA   |
| P2RY13        | ATCGTGCTGTTAGGGCTCATA    | CAAGATCGTATTTGGCAGGGAG   |
| MC2R          | GACTGTCTCGTGTGGTTTTG     | GGCTGCCCAGCATATCAGAT     |
| CHRNA2        | CTCCTCTGTGCGCCATCCTCA    | GGAAGGTCAGGTAAGTCTGAT    |
| HRH2          | CAGCAAGGGCAATCATAACCAC   | GATCAGTAGCGGGAGGTAGAA    |
| MS4A6A        | TGTGGCATGATGGTATTGAGC    | AGGGTCCTATGAATGGGTAAGC   |
| OR2H2         | CTTGTCTCTTACGGAGCCATTAC  | TCTCTTGGGCATAGGGATTTTTG  |
| XAF1          | GCTCCACGAGTCTACTGTG      | GTTCACTGCGACAGACATCTC    |
| STAT1         | CGGCTGAATTTTCGGCACCT     | CAGTAACGATGAGAGGACCCT    |
| FTMT          | TGGAGTGTGCTCTACTCTTGG    | ACGTGGTCACCTAGTTCTTTGA   |
| GON4L         | CTCAGGGAATCACCTACCTT     | CTCAGGGAATCACCTACCTT     |
| IL17A         | TCCCACGAAATCCAGGATGC     | GGATGTTGAGTTGACCATCAC    |
| MKL2          | TTATAGGCGTTGGGAAGGAGG    | CCGGAGACAAAGCGTCACT      |
| TNFSF10       | TGCGTGCTGATCGTGATCTTC    | GCTCGTTGGTAAAGTACACGTA   |

**Table S2.** Upregulated antiviral genes at 24 hpi.

| <b>Gene Symbol</b> | <b>Fold Change</b> | <b><i>p</i>-Value</b> |
|--------------------|--------------------|-----------------------|
| RSAD2              | 30.71              | 8.20E-04              |
| IFIT2              | 20.90              | 5.18E-03              |
| IFIT3              | 20.53              | 4.96E-04              |
| OASL               | 11.12              | 2.04E-03              |
| MX2                | 10.97              | 2.62E-03              |
| IFIT1              | 9.99               | 6.01E-04              |
| DDX58              | 9.55               | 3.99E-02              |
| OAS2               | 9.41               | 2.87E-03              |
| IFI44L             | 7.73               | 3.79E-03              |
| MX1                | 7.13               | 2.28E-03              |
| OAS1               | 6.56               | 2.72E-03              |
| IFIH1              | 5.12               | 1.57E-03              |
| ISG15              | 4.46               | 1.82E-03              |
| OAS3               | 4.05               | 2.02E-03              |
| STAT1              | 3.97               | 3.06E-03              |
| XAF1               | 3.82               | 1.09E-02              |
| IFI6               | 3.79               | 4.38E-03              |
| GBP1               | 3.60               | 2.54E-02              |
| IFIT5              | 3.57               | 4.24E-03              |
| DHX58              | 3.19               | 2.90E-03              |
| IL29               | 3.17               | 2.84E-02              |
| IFI27              | 3.13               | 3.65E-03              |
| IFI35              | 2.92               | 4.53E-02              |
| GBP4               | 2.90               | 1.10E-02              |
| IFNB1              | 2.74               | 2.35E-02              |
| IRF7               | 2.65               | 1.24E-02              |
| ZBP1               | 2.60               | 5.87E-03              |
| TAP1               | 2.41               | 4.00E-02              |
| IFITM1             | 2.38               | 1.41E-02              |
| TLR3               | 2.37               | 3.03E-02              |
| IFI16              | 2.18               | 6.38E-03              |
| MYD88              | 2.13               | 2.60E-03              |
| ADAR               | 2.12               | 3.37E-03              |
| STAT2              | 2.01               | 2.38E-03              |

**Table S3.**Co-upregulated genes among each time post-infection.

| Gene Symbol | 6 h             |             | 12 h            |             | 24 h            |             |
|-------------|-----------------|-------------|-----------------|-------------|-----------------|-------------|
|             | <i>p</i> -Value | Fold Change | <i>p</i> -Value | Fold Change | <i>p</i> -Value | Fold Change |
| MS4A6A      | 7.86E-03        | 5.28        | 9.80E-03        | 7.08        | 3.22E-03        | 2.57        |
| TFF3        | 1.46E-02        | 4.51        | 3.67E-02        | 3.92        | 1.26E-02        | 3.05        |
| ZG16        | 9.93E-03        | 3.66        | 7.51E-03        | 2.69        | 4.18E-02        | 2.77        |
| MEP1A       | 7.00E-03        | 3.32        | 2.33E-02        | 2.23        | 1.30E-02        | 2.39        |
| MAB21L3     | 1.97E-02        | 3.15        | 9.85E-03        | 3.46        | 2.82E-02        | 2.66        |
| RFX4        | 2.07E-02        | 3.14        | 1.22E-02        | 3.75        | 3.78E-02        | 4.94        |
| DEFB123     | 5.74E-03        | 2.86        | 1.73E-03        | 3.42        | 3.62E-02        | 4.34        |
| POPDC2      | 4.28E-02        | 2.77        | 1.77E-03        | 3.08        | 1.99E-02        | 3.79        |
| CDSN        | 3.27E-02        | 2.61        | 2.07E-03        | 3.46        | 6.29E-03        | 2.39        |
| OR2H2       | 1.65E-02        | 2.27        | 1.27E-02        | 2.45        | 1.42E-02        | 4.92        |
| ZFP57       | 1.81E-02        | 2.22        | 4.00E-02        | 4.23        | 2.11E-03        | 2.65        |
| MUC5AC      | 1.85E-02        | 2.19        | 2.49E-02        | 2.10        | 1.58E-02        | 2.13        |
| APOA5       | 5.41E-03        | 2.18        | 1.03E-02        | 2.41        | 9.82E-03        | 2.09        |
| CD55        | 7.95E-03        | 2.14        | 9.78E-03        | 2.21        | 3.23E-02        | 2.23        |
| RNF39       | 3.36E-02        | 2.11        | 3.51E-03        | 3.20        | 2.77E-02        | 2.66        |
| GAL3ST2     | 2.54E-02        | 2.10        | 1.38E-02        | 3.28        | 1.46E-02        | 4.75        |
| CSHL1       | 2.64E-03        | 2.07        | 5.84E-04        | 2.03        | 4.61E-02        | 2.51        |
| MUC12       | 3.58E-02        | 2.04        | 2.54E-02        | 2.05        | 2.83E-02        | 3.71        |
